# Supplementary material
Source: PubMed Central journal article supplement (PMC9185609)
Supplement: ajcr0012-2387-f4.pdf [file ajcr0012-2387-f4.pdf]

## Profiling the TME of TETs

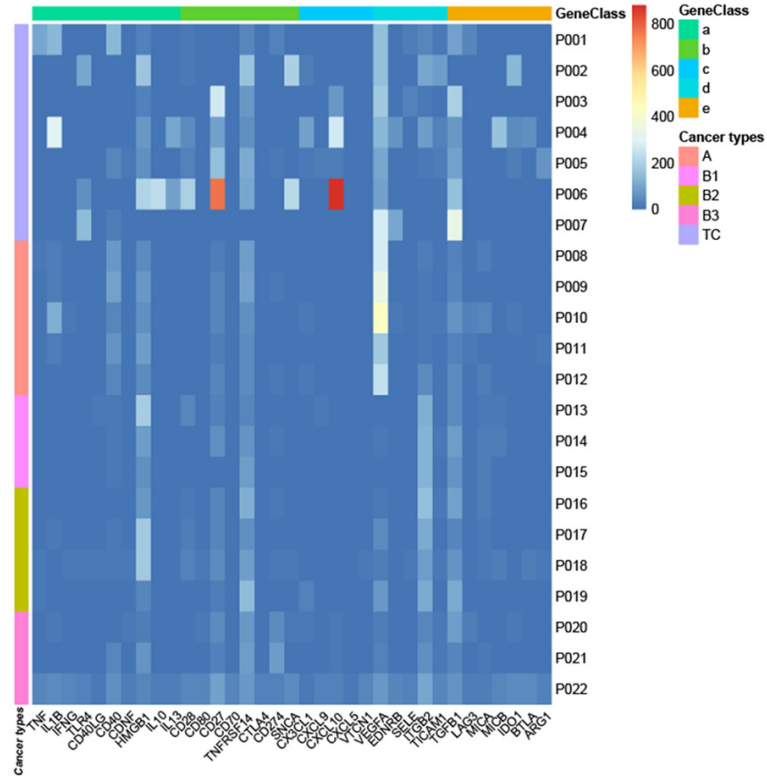

**Figure S1.** Heatmap showing the expression of genes involved in the immune response process in different subtypes of TETs. A: thymoma A, B1: thymoma B1, B2: thymoma B2, B3: thymoma B3, TC: thymic carcinoma, a: cancer-antigen presentation, b: priming and activation, c: trafficking of T cell to tumors, d: infiltration of cells into tumors (CTLs, endothelial cells), e: killing of cancer cells.
